# Supplementary material for: Treatment Access for Gastrointestinal Stromal Tumor in Predominantly Low- and Middle-Income Countries
Source: PubMed Central journal article supplement (PMC10993077; doi:10.1001/jamanetworkopen.2024.4898), 2024-04-03
Supplement: jamanetwopen-e244898-s001.pdf [file jamanetwopen-e244898-s001.pdf]

## Supplementary Online Content

Briercheck EL, Wrigglesworth JM, Garcia-Gonzalez I, et al. Treatment access for gastrointestinal stromal tumor in predominantly low- and middle-income countries. *JAMA Netw Open*. 2024;7(4):e244898. doi:10.1001/jamanetworkopen.2024.4898

**eMethods.** Statistical Methods, Informed Censoring Model, and Sensitivity Analysis

**eTable 1.** Frequency of Unique Patients by Country of Treatment

**eTable 2.** Demographic and Dosing Data for Sunitinib-Treated Cohort

**eTable 3.** Overall Survival (OS) Outcomes Based Upon Varied Assumptions and Adjusted Gamma Values in an Imputation-Based Modeling Approach for Patients Treated With Imatinib in the Adjuvant Setting

**eTable 4.** Hazard Ratios of Outcomes Stratified by Age at Approval

**eFigure 1.** Kaplan-Meier Curve of Overall Survival (OS) in the Metastatic or Unresectable Cohort Using Standard Censoring of Patients Lost to Follow-Up (LTFU)

**eFigure 2.** Sensitivity Analysis

**eFigure 3.** Pearson Correlation Test of Country Life Expectancy vs Age at Imatinib Approval

This supplementary material has been provided by the authors to give readers additional information about their work.

## **eMethods.** Statistical Methods, Informed Censoring Model, and Sensitivity Analysis

For imputation-based informed censoring missing outcomes were imputed via a bootstrap sampling of outcomes in patients with known outcomes. This approach uses common metadata between patients with known outcomes and LTFU patients to predict the most likely outcome in LTFU cases. Demographic data used to match patients with known outcomes and those LTFU were age at approval, sex, and income classification. After 20 iterations, the resulting datasets were used to create the Cox models and Kaplan Meier plots. A gamma value can be set to further adjust the model based upon whether patients LTFU are predicted by clinical inference to be more or less likely to have an event than the known cohort. For our primary analysis we chose an agnostic approach and set this value to zero (indicates no presumed difference in outcome between known and LTFU group). Stability of the model and sensitivity analysis was done by altering the gamma value 0, 0.5, 1.0, 1.5 and 2.0.

Data analysis and visualization were conducted using several R packages, including InformativeCensoring (v0.3.5), dplyr (v1.0.9), ggmap (v3.0.0), ggplot2 (v3.3.6), survminer (v0.4.9), tableone (v0.13.2), forestplot (v3.1.3), and R v4.1 or v4.2 packages, which are tools for data manipulation, plotting, and statistical analysis.

A p-value <0.05 was considered statistically significant.

**eTable 1.** Frequency of Unique Patients by Country of Treatment

| Country            | Total Patients | Country     | Total Patients | Country    | Total Patients |
|--------------------|----------------|-------------|----------------|------------|----------------|
| Argentina          | 19             | El Salvador | 32             | Madagascar | 10             |
| Armenia            | 26             | Ethiopia    | 46             | Malawi     | <5             |
| Azerbaijan         | 74             | Fiji        | <5             | Malaysia   | 166            |
| Benin              | <5             | Gabon       | <5             | Mali       | 21             |
| Bhutan             | <5             | Georgia     | 107            | Mauritius  | 37             |
| Bolivia            | 31             | Ghana       | 41             | Mexico     | 141            |
| Burkina Faso       | 7              | Guatemala   | 64             | Moldova    | 53             |
| Cambodia           | 14             | Haiti       | 9              | Mongolia   | 14             |
| Cameroon           | 24             | Honduras    | 41             | Morocco    | 18             |
| Chile              | 333            | India       | 1874           | Namibia    | <5             |
| China              | 2534           | Indonesia   | 69             | Nepal      | 238            |
| Colombia           | <5             | Jamaica     | 76             | Nicaragua  | 33             |
| Costa Rica         | <5             | Kazakhstan  | <5             | Niger      | <5             |
| Cote d'Ivoire      | 6              | Kenya       | 445            | Nigeria    | 89             |
| Dominican Republic | 72             | Lebanon     | <5             | Pakistan   | 113            |

|                  |     |                 |     |            |      |
|------------------|-----|-----------------|-----|------------|------|
| Papua New Guinea | <5  | Sierra Leone    | <5  | Thailand   | 2018 |
| Paraguay         | 33  | Singapore       | 41  | Togo       | <5   |
| Peru             | 16  | Solomon Islands | <5  | Uganda     | 42   |
| Philippines      | 145 | South Africa    | 324 | Uzbekistan | 9    |
| Rwanda           | 8   | Sri Lanka       | 55  | Vietnam    | 1714 |
| Senegal          | 57  | Sudan           | 498 | Zambia     | 24   |
| Seychelles       | 8   | Tanzania        | 23  | Zimbabwe   | 86   |

**eTable 2.** Demographic and Dosing Data for Sunitinib-Treated Cohort

|                                    | <b>Overall (N=102)</b> |
|------------------------------------|------------------------|
| <b>Sex</b>                         |                        |
| F                                  | 44 (43.1%)             |
| M                                  | 58 (56.9%)             |
| <b>Age at approval</b>             |                        |
| Median [Min, Max]                  | 51.0 [24.0, 76.0]      |
| <b>World Bank Income Group</b>     |                        |
| Low income                         | 33 (32.4%)             |
| Lower-middle income                | 63 (61.8%)             |
| Upper-middle income                | 6 (5.9%)               |
| High-income                        | 0 (0%)                 |
| <b>Minimum sunitinib dose (mg)</b> |                        |
| 25                                 | 3 (2.9%)               |
| 37                                 | 3 (2.9%)               |
| 50                                 | 96 (94.1%)             |
| <b>Maximum sunitinib dose (mg)</b> |                        |
| 25                                 | 1 (1.0%)               |
| 50                                 | 99 (97.1%)             |
| missing                            | 2 (2.0%)               |

**eTable 3.** Overall Survival (OS) Outcomes Based Upon Varied Assumptions and Adjusted Gamma Values in an Imputation-Based Modeling Approach for Patients Treated With Imatinib in the Adjuvant Setting

|            | Events              | Median OS in years (SD) | 3-year % OS (SD)         | 5-year % OS (SD)         | 10-year % OS (SD)         |
|------------|---------------------|-------------------------|--------------------------|--------------------------|---------------------------|
| EventOS    | 92.00               | NA                      | 95.6                     | 92.8                     | 77.1                      |
| EventLTFOS | 569.00              | 7.012                   | 76.7                     | 58.6                     | 31.7                      |
|            | Average Events (SD) | Median OS in years (SD) | 3-year Average % OS (SD) | 5-year Average % OS (SD) | 10-year Average % OS (SD) |
| Gamma=0    | 137.55 (11.5)       | NA                      | 95.6 (0.2)               | 92.5 (0.6)               | 73.8 (8.1)                |
| Gamma=0.5  | 158.50 (17.7)       | NA                      | 95.2 (0.2)               | 91.5 (1.1)               | 69.8 (8.9)                |
| Gamma=1    | 184.50 (16.4)       | 9.306 (<0.1)            | 94.8 (0.4)               | 89.7 (1.1)               | 60.8 (9.7)                |
| Gamma=1.5  | 209.1 (23.4)        | 9.306 (<0.1)            | 94.3 (0.5)               | 88.5 (1.4)               | 58.6 (11.0)               |
| Gamma=2    | 266.60 (29.0.1)     | 9.202 (0.1)             | 93.2 (0.7)               | 84.4 (2.6)               | 48.0 (12.0)               |

EventOS = standard censoring. EventLTFOS= all lost to follow-up cases are presumed deceased. Subsequent rows indicate imputation-based averages of 20 imputations with adjusted gamma values as indicated. SD = standard deviation, NA= not applicable

**eTable 4.** Hazard Ratios of Outcomes Stratified by Age at Approval

| Stratification                           | Adjuvant                | Unresectable/Metastatic |
|------------------------------------------|-------------------------|-------------------------|
| <b>Two Group Age at approval</b>         | <b>Hazard Estimate</b>  | <b>Hazard Estimate</b>  |
| <50                                      | 1.0                     | 1.0                     |
| ≥50                                      | 2.01 [1.5,2.7] (p<.001) | 1.25 [1.2,1.3] (p<.001) |
| <b>Sex and Two Group Age at approval</b> |                         |                         |
| Female, <50                              | 1.0                     | 1.0                     |
| Female, ≥50                              | 2.1 [1.0,4.3] (p=.06)   | 1.2 [1.1,1.4,] (p=.001) |
| Male, <50                                | 0.87 [0.5,1.6] (p=.65)  | 1.1 [0.9,1.2] (p=.305)  |
| Male, ≥50                                | 2.3 [1.5,3.5] (p<.001)  | 1.4 [1.2,1.5] (p<.001)  |
| <b>Four Group Age at approval</b>        |                         |                         |
| <40                                      | 1.0                     | 1.0                     |
| ≥40-<55                                  | 1.9 [1.1,3.3] (p=.024)  | 1.0 [0.9,1.1] (p=.783)  |
| ≥55-65                                   | 2.4 [1.3,4.2] (p=.004)  | 1.2 [1.0,1.3] (p=.014)  |
| ≥65                                      | 4.2 [2.4,7.5] (p<.001)  | 1.5 [1.4,1.8] (p<.001)  |

Hazard ratios of outcomes stratified by age at approval in two groups, two age groups at approval further stratified by sex and four age groups at approval. Ninety-five percent confidence intervals are shown in brackets.

**eFigure 1.** Kaplan-Meier Curve of Overall Survival (OS) in the Metastatic or Unresectable Cohort Using Standard Censoring of Patients Lost to Follow-Up (LTFU)

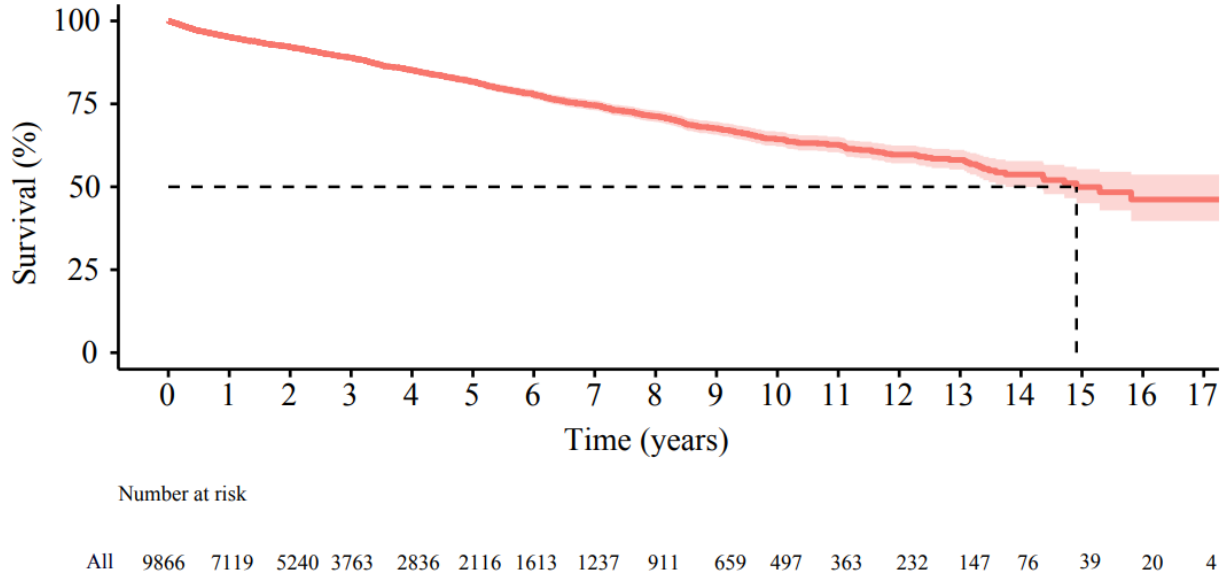

Dashed line demonstrates median OS. Number at risk at each time point are shown immediately below each curve. Confidence intervals are indicated by shading along the curve.



**eFigure 2. Sensitivity Analysis**

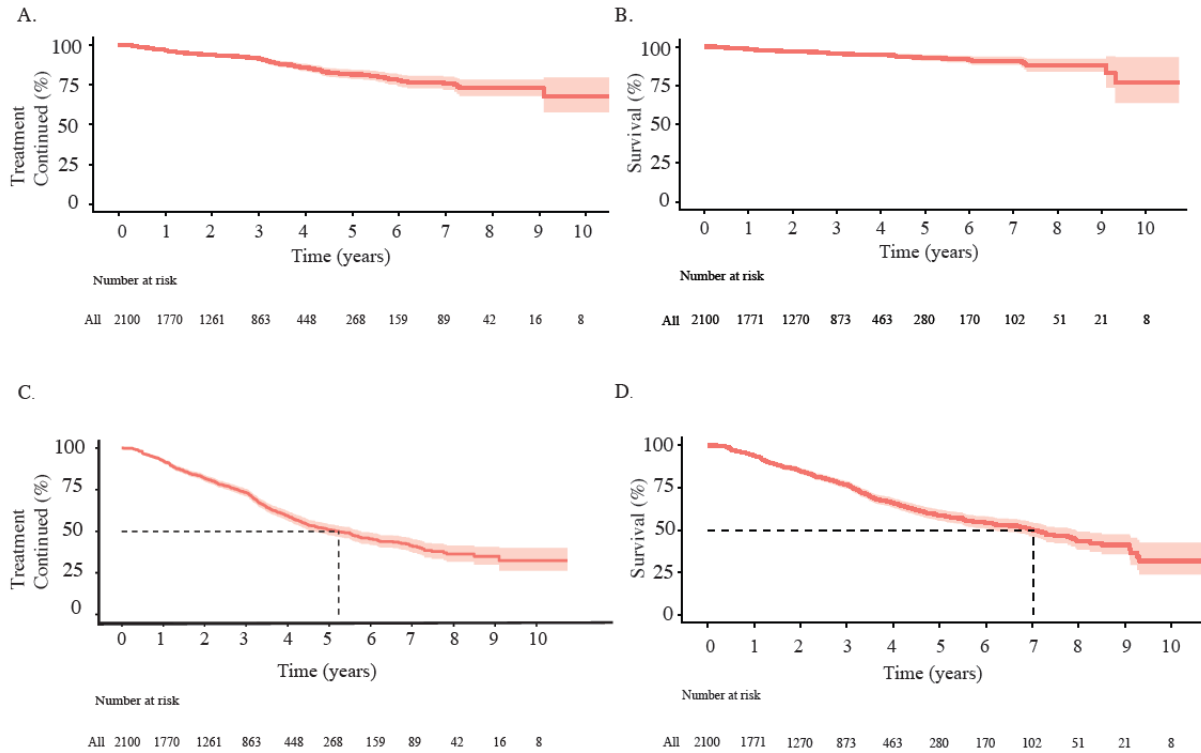

Kaplan-Meier curves of time to treatment discontinuation (A) and overall survival (B) of patients treated with imatinib in the adjuvant setting using standard censoring. Kaplan-Meier curves of time to treatment discontinuation (C) and overall survival (D) for patients treated with imatinib in the adjuvant setting assuming all patients lost to follow-up (LTFU) were deceased. Dashed line demonstrates median OS. Number at risk at each time point are shown immediately below each curve. Confidence intervals are indicated by shading along the curve.

**eFigure 3.** Pearson Correlation Test of Country Life Expectancy vs Age at Imatinib

Approval

A.

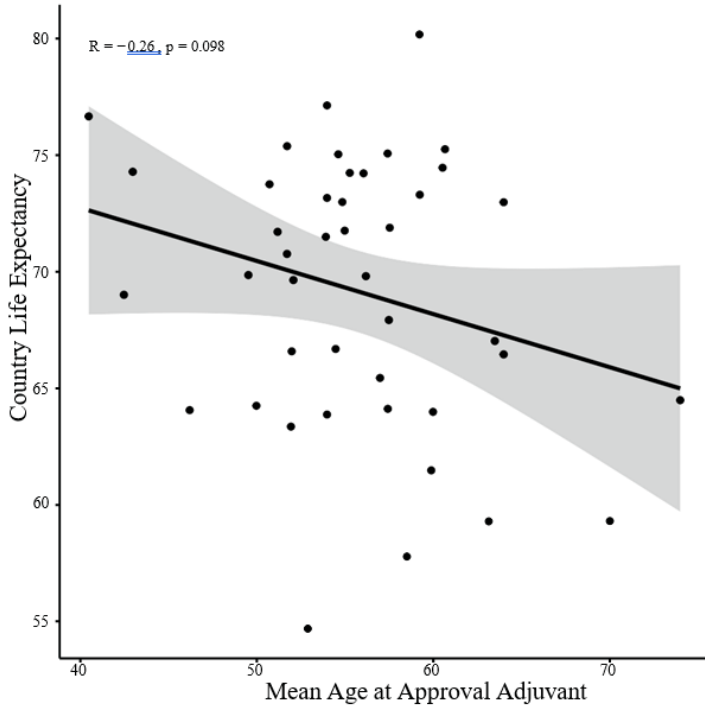

B.

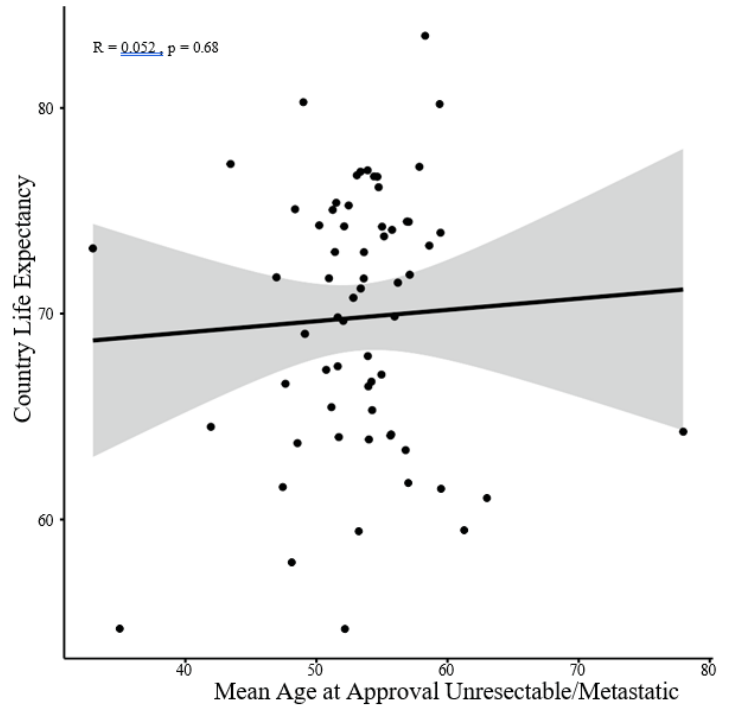

(A) adjuvant and (B) metastatic cohorts.
