# Supplementary material for: Treatment Access for Gastrointestinal Stromal Tumor in Predominantly Low- and Middle-Income Countries
Source: PubMed Central journal article supplement (PMC10993077; doi:10.1001/jamanetworkopen.2024.4898), 2024-04-03
Supplement: jamanetwopen-e244898-s002.pdf [file jamanetwopen-e244898-s002.pdf]

## Data Sharing Statement

Briercheck. Treatment Access for Gastrointestinal Stromal Tumor in Predominantly Low- and Middle-Income Countries. *JAMA Netw Open*. Published April 03, 2024.

doi:10.1001/jamanetworkopen.2024.4898

### Data

**Data available:** Yes

**Data types:** Deidentified participant data

**How to access data:** Deidentified data will be made available upon request by the corresponding author ([michael\\_wagner@dfci.harvard.edu](mailto:michael_wagner@dfci.harvard.edu)) after approval by The Max Foundation ([pato@themaxfoundation.org](mailto:pato@themaxfoundation.org)).

**When available:** With publication

### Supporting Documents

**Document types:** None

### Additional Information

**Who can access the data:** Researchers whose proposed use of the data has been approved.

**Types of analyses:** For purposes approved by The Max Foundation.

**Mechanisms of data availability:** after approval of a proposal
